# Supplementary material for: Selection Signatures Analysis Reveals Genes Associated with High-Altitude Adaptation in Tibetan Goats from Nagqu, Tibet
Source: MDPI journal article supplement (doi:10.3390/ani10091599), 2020-09-08
Supplement: s1 [file s1]

| Gene          | Prime(5'to3')           |
|---------------|-------------------------|
| <i>LEPR-F</i> | GGAGCGCCCTTCTTACCTTT    |
| <i>LEPR-R</i> | GTTAGACCCAACCGCTGTCA    |
| <i>LDB1-F</i> | TTATGTCCCGCCACAAGACC    |
| <i>LDB1-R</i> | CCACCACCATCACATCCTGG    |
| <i>EGFR-F</i> | GCAGAACGAAGCAACATGGC    |
| <i>EGFR-R</i> | GATGAGCACAGTGGGTGACA    |
| <i>FGF2-F</i> | GGCCACTTTAAGGACCCCA     |
| <i>FGF2-R</i> | GAAGTTGTAGTTTGATGTGAGGG |
