# Supplementary material for: Selection Signatures Analysis Reveals Genes Associated with High-Altitude Adaptation in Tibetan Goats from Nagqu, Tibet
Source: MDPI journal article supplement (doi:10.3390/ani10091599), 2020-09-08
Supplement: s1 [file s1]

| ID                           | position  | chr | start     | end       | di    | Gene     |
|------------------------------|-----------|-----|-----------|-----------|-------|----------|
| snp54289-scaffold83-525657   | 76209578  | 3   | 76162714  | 76317920  | 16.70 | LEPR     |
| snp17727-scaffold184-861468  | 25037421  | 10  | 24935999  | 25122183  | 13.49 | AVEN     |
| snp17727-scaffold184-861468  | 25037421  | 10  | 24921289  | 24999162  | 13.49 | CHRM5    |
| snp41102-scaffold532-545458  | 21185062  | 26  | 21228334  | 21231762  | 13.47 | ELOVL3   |
| snp41102-scaffold532-545458  | 21185062  | 26  | 21141754  | 21148842  | 13.47 | LDB1     |
| snp41102-scaffold532-545458  | 21185062  | 26  | 21182333  | 21192773  | 13.47 | NOLC1    |
| snp41102-scaffold532-545458  | 21185062  | 26  | 21233421  | 21243176  | 13.47 | PITX3    |
| snp41102-scaffold532-545458  | 21185062  | 26  | 21166732  | 21180872  | 13.47 | PPRC1    |
| snp7379-scaffold127-22944    | 106846311 | 2   | 106827675 | 106851734 | 13.39 | ASIC4    |
| snp7379-scaffold127-22944    | 106846311 | 2   | 106851902 | 106856866 | 13.39 | CHPF     |
| snp7379-scaffold127-22944    | 106846311 | 2   | 106814192 | 106821504 | 13.39 | GMPPA    |
| snp7379-scaffold127-22944    | 106846311 | 2   | 106887841 | 106890949 | 13.39 | INHA     |
| snp7379-scaffold127-22944    | 106846311 | 2   | 106865331 | 106886119 | 13.39 | OBSL1    |
| snp7379-scaffold127-22944    | 106846311 | 2   | 106859385 | 106865197 | 13.39 | TMEM198  |
| snp2518-scaffold1071-477188  | 119890175 | 2   | 119917739 | 119953380 | 12.93 | TRIM62   |
| snp59584-scaffold983-609280  | 5464673   | 29  | 5251872   | 5432690   | 12.84 | NOX4     |
| snp59584-scaffold983-609280  | 5464673   | 29  | 5461794   | 5571971   | 12.84 | TYR      |
| snp11512-scaffold1420-40982  | 96955132  | 10  | 96802259  | 97137189  | 12.64 | FOXN3    |
| snp33758-scaffold397-1371358 | 34739282  | 10  | 34752400  | 34796566  | 12.56 | TMEM62   |
| snp33758-scaffold397-1371358 | 34739282  | 10  | 34565526  | 34725689  | 12.56 | UBR1     |
| snp45884-scaffold63-3008636  | 30996340  | 30  | 30970998  | 31281222  | 12.48 | GRIA3    |
| snp32100-scaffold362-811160  | 92616687  | 4   | 92330009  | 92709988  | 12.38 | MKLN1    |
| snp50457-scaffold723-196705  | 7254399   | 9   | 7081335   | 7344049   | 12.33 | BCKDHB   |
| snp15414-scaffold1634-488849 | 37514796  | 13  | 37508636  | 37860922  | 11.99 | SLC24A3  |
| snp47935-scaffold675-2898965 | 28133226  | 3   | 28083566  | 28146683  | 11.95 | LRIG2    |
| snp32084-scaffold362-134195  | 91939722  | 4   | 91769318  | 91909928  | 11.91 | COPG2    |
| snp55237-scaffold85-2363783  | 16291240  | 7   | 16265763  | 16282966  | 11.75 | ANKRD24  |
| snp55237-scaffold85-2363783  | 16291240  | 7   | 16243124  | 16257270  | 11.75 | CCDC94   |
| snp55237-scaffold85-2363783  | 16291240  | 7   | 16305170  | 16316543  | 11.75 | CREB3L3  |
| snp55237-scaffold85-2363783  | 16291240  | 7   | 16259440  | 16265334  | 11.75 | EBI3     |
| snp55237-scaffold85-2363783  | 16291240  | 7   | 16296363  | 16304502  | 11.75 | SIRT6    |
| snp26248-scaffold275-1191080 | 18337373  | 27  | 18289158  | 18414979  | 11.74 | MTUS1    |
| snp27104-scaffold289-2210159 | 56266918  | 6   | 56259126  | 56330604  | 11.65 | FAM114A1 |
| snp27104-scaffold289-2210159 | 56266918  | 6   | 56234130  | 56257032  | 11.65 | TLR6     |
| snp985-scaffold1025-3046389  | 97443273  | 6   | 97387763  | 97953980  | 11.53 | ARHGAP24 |
| snp25796-scaffold266-695146  | 124797258 | 1   | 124721148 | 124761967 | 11.44 | GRK7     |
| snp25796-scaffold266-695146  | 124797258 | 1   | 124796798 | 124803873 | 11.44 | RNF7     |
| snp41241-scaffold535-546074  | 47768536  | 14  | 47774560  | 47807404  | 11.27 | LY96     |
| snp41241-scaffold535-546074  | 47768536  | 14  | 47733734  | 47754308  | 11.27 | TCEB1    |
| snp41241-scaffold535-546074  | 47768536  | 14  | 47761873  | 47768084  | 11.27 | TMEM70   |
| snp20922-scaffold2050-85852  | 5801467   | 2   | 5829532   | 5845614   | 11.24 | NEMP2    |
| snp10545-scaffold1376-836918 | 73764143  | 8   | 73760144  | 73825534  | 11.13 | UBAP1    |
| snp57542-scaffold92-3437740  | 7154989   | 30  | 7061109   | 7183789   | 11.10 | PCDH19   |
| snp21697-scaffold2121-649938 | 68267325  | 1   | 68159689  | 68302684  | 11.06 | ZNF148   |
| snp17157-scaffold1790-196441 | 7168075   | 23  | 7145089   | 7146070   | 11.00 | B3GALT4  |
| snp17157-scaffold1790-196441 | 7168075   | 23  | 7156247   | 7157540   | 11.00 | PFDN6    |
| snp17157-scaffold1790-196441 | 7168075   | 23  | 7158086   | 7164475   | 11.00 | RGL2     |
| snp17157-scaffold1790-196441 | 7168075   | 23  | 7138898   | 7143599   | 11.00 | RPS18    |
| snp17157-scaffold1790-196441 | 7168075   | 23  | 7167142   | 7177208   | 11.00 | TAPBP    |
| snp17157-scaffold1790-196441 | 7168075   | 23  | 7122854   | 7138733   | 11.00 | VPS52    |
| snp17157-scaffold1790-196441 | 7168075   | 23  | 7146777   | 7155932   | 11.00 | WDR46    |
| snp17157-scaffold1790-196441 | 7168075   | 23  | 7177290   | 7180090   | 11.00 | ZBTB22   |
| snp36027-scaffold431-5387495 | 50789168  | 12  | 50651317  | 50757797  | 10.99 | SCEL     |
| snp36027-scaffold431-5387495 | 50789168  | 12  | 50788052  | 50839350  | 10.99 | SLAIN1   |
| snp56584-scaffold894-1377437 | 13428714  | 30  | 13307355  | 13389021  | 10.93 | FRMPD3   |

|                              |          |    |          |          |       |            |
|------------------------------|----------|----|----------|----------|-------|------------|
| snp56584-scaffold894-1377437 | 13428714 | 30 | 13407960 | 13434049 | 10.93 | PRPS1      |
| snp6892-scaffold1251-915917  | 736907   | 22 | 785628   | 852401   | 10.90 | EGFR       |
| snp6892-scaffold1251-915917  | 736907   | 22 | 584063   | 747522   | 10.90 | LANCL2     |
| snp47921-scaffold675-2270475 | 27504736 | 3  | 27536095 | 27619801 | 10.80 | PHTF1      |
| snp47921-scaffold675-2270475 | 27504736 | 3  | 27430646 | 27489332 | 10.80 | PTPN22     |
| snp47921-scaffold675-2270475 | 27504736 | 3  | 27490950 | 27533531 | 10.80 | RSBN1      |
| snp52787-scaffold791-1202632 | 53852339 | 14 | 53784986 | 53840413 | 10.64 | TPD52      |
| snp51156-scaffold75-97384    | 41026652 | 14 | 41072834 | 41075167 | 10.55 | CRH        |
| snp51156-scaffold75-97384    | 41026652 | 14 | 40907431 | 41005497 | 10.55 | DNAJC5B    |
| snp51156-scaffold75-97384    | 41026652 | 14 | 41013233 | 41071860 | 10.55 | TRIM55     |
| snp24469-scaffold248-1981827 | 75342927 | 6  | 74809035 | 75749184 | 10.53 | ADGRL3     |
| snp43564-scaffold581-1449908 | 34655099 | 17 | 34698642 | 34711437 | 10.53 | BBS12      |
| snp43564-scaffold581-1449908 | 34655099 | 17 | 34572732 | 34623101 | 10.53 | FGF2       |
| snp33101-scaffold386-813440  | 34104967 | 7  | 34140493 | 34149120 | 10.49 | ARL10      |
| snp33101-scaffold386-813440  | 34104967 | 7  | 33904798 | 34081773 | 10.49 | COMMD10    |
| snp33101-scaffold386-813440  | 34104967 | 7  | 34150928 | 34155702 | 10.49 | NOP16      |
| snp55438-scaffold859-502903  | 8597199  | 19 | 8592630  | 8604524  | 10.44 | MKS1       |
| snp1265-scaffold1032-527606  | 40038557 | 7  | 40052356 | 40065398 | 10.36 | APC2       |
| snp1265-scaffold1032-527606  | 40038557 | 7  | 40068635 | 40073570 | 10.36 | C7H19orf25 |
| snp1265-scaffold1032-527606  | 40038557 | 7  | 40021283 | 40033073 | 10.36 | DAZAP1     |
| snp1265-scaffold1032-527606  | 40038557 | 7  | 40002559 | 40006626 | 10.36 | GAMT       |
| snp1265-scaffold1032-527606  | 40038557 | 7  | 39995886 | 40001859 | 10.36 | NDUFS7     |
| snp1265-scaffold1032-527606  | 40038557 | 7  | 40079120 | 40086271 | 10.36 | PCSK4      |
| snp1265-scaffold1032-527606  | 40038557 | 7  | 40086565 | 40091478 | 10.36 | REEP6      |
| snp1265-scaffold1032-527606  | 40038557 | 7  | 40033646 | 40038261 | 10.36 | RPS15      |
| snp17939-scaffold185-5714191 | 67344973 | 11 | 67377685 | 67422014 | 10.25 | C11H2orf42 |
| snp17939-scaffold185-5714191 | 67344973 | 11 | 67316495 | 67317969 | 10.25 | PCBP1      |
| snp44957-scaffold612-2110770 | 24401411 | 14 | 24356966 | 24360773 | 10.23 | FAM84B     |
| snp5961-scaffold121-842233   | 60191126 | 17 | 60233187 | 60354722 | 10.22 | RBM19      |
| snp28572-scaffold306-590080  | 62759584 | 1  | 62636308 | 62757367 | 10.12 | ARHGAP31   |
| snp28572-scaffold306-590080  | 62759584 | 1  | 62796734 | 62824745 | 10.12 | POGLUT1    |
| snp28572-scaffold306-590080  | 62759584 | 1  | 62763357 | 62792615 | 10.12 | TMEM39A    |
| snp32085-scaffold362-167849  | 91973376 | 4  | 91997852 | 91998275 | 10.06 | KLF14      |
| snp32085-scaffold362-167849  | 91973376 | 4  | 91911477 | 91940810 | 10.06 | TSGA13     |
| snp23237-scaffold2321-8304   | 13032718 | 7  | 13036630 | 13040242 | 10.02 | MCEMP1     |
| snp23237-scaffold2321-8304   | 13032718 | 7  | 12992845 | 12994405 | 10.02 | PCP2       |
| snp23237-scaffold2321-8304   | 13032718 | 7  | 12991004 | 12992856 | 10.02 | PET100     |
| snp23237-scaffold2321-8304   | 13032718 | 7  | 13027692 | 13029076 | 10.02 | RETN       |
| snp23237-scaffold2321-8304   | 13032718 | 7  | 13000329 | 13007750 | 10.02 | STXBP2     |
| snp23237-scaffold2321-8304   | 13032718 | 7  | 13042227 | 13043120 | 10.02 | TRAPPC5    |
| snp23237-scaffold2321-8304   | 13032718 | 7  | 12984937 | 12990947 | 10.02 | XAB2       |
| snp3244-scaffold1098-457580  | 4502046  | 11 | 4528687  | 4601617  | 9.91  | EIF5B      |
| snp3244-scaffold1098-457580  | 4502046  | 11 | 4466544  | 4475771  | 9.91  | LYG1       |
| snp3244-scaffold1098-457580  | 4502046  | 11 | 4515791  | 4527738  | 9.91  | TXNDC9     |
| snp27492-scaffold293-907201  | 11926983 | 11 | 11476305 | 12179043 | 9.90  | EXOC6B     |
| snp604-scaffold1017-348078   | 56400985 | 1  | 56347414 | 56363551 | 9.89  | C1H3orf17  |
| snp35336-scaffold424-186719  | 43969076 | 14 | 44012517 | 44155788 | 9.89  | SLCO5A1    |
| snp35336-scaffold424-186719  | 43969076 | 14 | 43808688 | 44000983 | 9.89  | SULF1      |
| snp9887-scaffold1352-1895771 | 92501014 | 6  | 92171959 | 92874079 | 9.83  | C6H4orf22  |
| snp23727-scaffold2397-129302 | 25168211 | 3  | 25157873 | 25187546 | 9.82  | MAB21L3    |
| snp25656-scaffold264-2485279 | 67062398 | 17 | 66957574 | 67019454 | 9.73  | PITPNB     |
| snp41145-scaffold532-2362038 | 19368482 | 26 | 19317143 | 19345584 | 9.68  | CPN1       |
| snp15377-scaffold1630-177736 | 58443867 | 11 | 57514933 | 58504409 | 9.66  | LRRTM4     |
| snp40394-scaffold515-4095049 | 90582403 | 2  | 90534869 | 90586090 | 9.64  | CARF       |
| snp40394-scaffold515-4095049 | 90582403 | 2  | 90585227 | 90772748 | 9.64  | NBEAL1     |
| snp40394-scaffold515-4095049 | 90582403 | 2  | 90508437 | 90534459 | 9.64  | WDR12      |

|                              |           |    |           |           |      |           |
|------------------------------|-----------|----|-----------|-----------|------|-----------|
| snp32947-scaffold383-159900  | 69928227  | 5  | 69663588  | 70119857  | 9.63 | LARGE     |
| snp52786-scaffold791-1170476 | 53820183  | 14 | 53677377  | 53780299  | 9.63 | MRPS28    |
| snp57366-scaffold913-1308916 | 7929102   | 20 | 7650142   | 7928735   | 9.57 | ARHGEF28  |
| snp51555-scaffold757-135443  | 25866321  | 30 | 25748125  | 26122733  | 9.55 | HS6ST2    |
| snp33594-scaffold394-2924580 | 44645507  | 5  | 44622695  | 44636968  | 9.53 | DYRK2     |
| snp25660-scaffold264-2701728 | 67278847  | 17 | 67078521  | 67632659  | 9.50 | TTC28     |
| snp16421-scaffold173-1073466 | 3385427   | 16 | 3331255   | 3580861   | 9.45 | SRGAP2    |
| snp50762-scaffold734-1162323 | 24813881  | 25 | 24830748  | 24855485  | 9.45 | KDM8      |
| snp50762-scaffold734-1162323 | 24813881  | 25 | 24855559  | 24891405  | 9.45 | NSMCE1    |
| snp59904-scaffold997-1140734 | 75707948  | 30 | 75721825  | 75927494  | 9.43 | AR        |
| snp55187-scaffold849-159480  | 61789330  | 13 | 61811646  | 61908881  | 9.42 | ITCH      |
| snp9212-scaffold1336-68580   | 72963915  | 12 | 72933642  | 73220760  | 9.42 | NALCN     |
| snp41142-scaffold532-2260226 | 19470294  | 26 | 19518948  | 19527580  | 9.41 | BLOC1S2   |
| snp41142-scaffold532-2260226 | 19470294  | 26 | 19446514  | 19482778  | 9.41 | CHUK      |
| snp41142-scaffold532-2260226 | 19470294  | 26 | 19490160  | 19514644  | 9.41 | CWF19L1   |
| snp41142-scaffold532-2260226 | 19470294  | 26 | 19403189  | 19441221  | 9.41 | ERLIN1    |
| snp29609-scaffold321-1675691 | 48808361  | 3  | 48778655  | 48868913  | 9.39 | KIAA1107  |
| snp32259-scaffold366-1926353 | 83700229  | 8  | 83644455  | 83679264  | 9.38 | SPATA31C2 |
| snp2777-scaffold1080-70178   | 98775438  | 6  | 98596874  | 98816491  | 9.37 | PTPN13    |
| snp14196-scaffold1568-335289 | 51105459  | 1  | 50890041  | 51179306  | 9.32 | BBX       |
| snp8284-scaffold130-1125304  | 126962003 | 2  | 126920548 | 126926696 | 9.32 | SYF2      |
| snp7273-scaffold1269-654749  | 53250483  | 7  | 53275919  | 53294648  | 9.22 | GRXCR2    |
| snp7273-scaffold1269-654749  | 53250483  | 7  | 53149598  | 53232190  | 9.22 | PRELID2   |
| snp52831-scaffold792-330324  | 9553507   | 12 | 9528182   | 9530477   | 9.21 | RGCC      |
| snp52831-scaffold792-330324  | 9553507   | 12 | 9594837   | 9956871   | 9.21 | VWA8      |
| snp4582-scaffold1147-469297  | 72137334  | 30 | 72187276  | 72189276  | 9.19 | CXHXorf65 |
| snp4582-scaffold1147-469297  | 72137334  | 30 | 72183139  | 72186797  | 9.19 | IL2RG     |
| snp4582-scaffold1147-469297  | 72137334  | 30 | 72155265  | 72176855  | 9.19 | MED12     |
| snp4582-scaffold1147-469297  | 72137334  | 30 | 72130305  | 72151017  | 9.19 | NLGN3     |
| snp41103-scaffold532-580629  | 21149891  | 26 | 21114878  | 21117471  | 9.14 | HPS6      |
| snp40753-scaffold521-2252025 | 29398586  | 5  | 29428487  | 29431060  | 9.13 | C1QL4     |
| snp40753-scaffold521-2252025 | 29398586  | 5  | 29414012  | 29417381  | 9.13 | DNAJC22   |
| snp40753-scaffold521-2252025 | 29398586  | 5  | 29432200  | 29439635  | 9.13 | TROAP     |
| snp14894-scaffold16-2229656  | 8445993   | 8  | 8465609   | 8481346   | 9.12 | PRSS55    |
| snp14894-scaffold16-2229656  | 8445993   | 8  | 8398220   | 8445786   | 9.12 | RP1L1     |
| snp21065-scaffold2061-608263 | 8792700   | 9  | 8769596   | 8775683   | 9.08 | FAM46A    |
| snp49813-scaffold711-1595891 | 19692854  | 20 | 18950997  | 20290853  | 9.07 | PDE4D     |
| snp8318-scaffold130-2544343  | 128381042 | 2  | 128385560 | 128389278 | 9.07 | RPL11     |
| snp8318-scaffold130-2544343  | 128381042 | 2  | 128334448 | 128344948 | 9.07 | TCEB3     |
| snp33091-scaffold386-396847  | 33688374  | 7  | 33614278  | 33743021  | 9.04 | SEMA6A    |
| snp52988-scaffold796-515837  | 28808847  | 29 | 28623621  | 29234673  | 9.03 | KIRREL3   |
| snp54991-scaffold841-747978  | 14600266  | 3  | 14587287  | 14596108  | 9.03 | ADAM15    |
| snp54991-scaffold841-747978  | 14600266  | 3  | 14597814  | 14613863  | 9.03 | DCST1     |
| snp54991-scaffold841-747978  | 14600266  | 3  | 14614171  | 14626762  | 9.03 | DCST2     |
| snp54991-scaffold841-747978  | 14600266  | 3  | 14561935  | 14565030  | 9.03 | EFNA3     |
| snp54991-scaffold841-747978  | 14600266  | 3  | 14581511  | 14586071  | 9.03 | EFNA4     |
| snp54991-scaffold841-747978  | 14600266  | 3  | 14626843  | 14637296  | 9.03 | ZBTB7B    |
| snp29615-scaffold321-1976019 | 48508033  | 3  | 48251606  | 48474506  | 9.02 | EVI5      |
| snp29615-scaffold321-1976019 | 48508033  | 3  | 48498587  | 48501155  | 9.02 | GFI1      |
| snp45284-scaffold618-2195419 | 19114049  | 11 | 19083404  | 19153691  | 9.00 | STRN      |
| snp43749-scaffold588-774844  | 13831096  | 9  | 13527116  | 14710238  | 8.94 | NKAIN2    |
| snp24537-scaffold2495-85440  | 55477443  | 1  | 55483123  | 55519262  | 8.94 | C1H3orf52 |
| snp24537-scaffold2495-85440  | 55477443  | 1  | 55526538  | 55543775  | 8.94 | GCSAM     |
| snp24537-scaffold2495-85440  | 55477443  | 1  | 55427872  | 55473103  | 8.94 | TMPRSS7   |
| snp3666-scaffold112-341273   | 58759049  | 16 | 58791035  | 58919952  | 8.94 | CEP350    |
| snp3666-scaffold112-341273   | 58759049  | 16 | 58677896  | 58729856  | 8.94 | TOR1AIP1  |

|                               |           |    |           |           |      |         |
|-------------------------------|-----------|----|-----------|-----------|------|---------|
| snp54733-scaffold837-2429935  | 54471875  | 15 | 54364463  | 54437469  | 8.88 | BBOX1   |
| snp9204-scaffold1335-579872   | 44445600  | 19 | 44409898  | 44430865  | 8.81 | GOSR2   |
| snp9204-scaffold1335-579872   | 44445600  | 19 | 44468551  | 44491768  | 8.81 | WNT9B   |
| snp11895-scaffold144-2363622  | 69290450  | 3  | 69335422  | 70349598  | 8.76 | NEGR1   |
| snp46578-scaffold646-549778   | 96502919  | 4  | 96339723  | 96487711  | 8.76 | CNOT4   |
| snp46578-scaffold646-549778   | 96502919  | 4  | 96533891  | 96611277  | 8.76 | NUP205  |
| snp46578-scaffold646-549778   | 96502919  | 4  | 96522172  | 96523032  | 8.76 | TPT1    |
| snp8353-scaffold130-4097690   | 129934389 | 2  | 129926618 | 129945931 | 8.73 | CDC42   |
| snp8353-scaffold130-4097690   | 129934389 | 2  | 129890982 | 129904623 | 8.73 | WNT4    |
| snp18546-scaffold1873-188325  | 1478448   | 12 | 1088626   | 1608949   | 8.72 | DIAPH3  |
| snp20370-scaffold202-255496   | 30032239  | 2  | 29931506  | 30143448  | 8.68 | CSRNP3  |
| snp40422-scaffold516-813964   | 72998924  | 15 | 72969518  | 73065742  | 8.68 | CKAP5   |
| snp40422-scaffold516-813964   | 72998924  | 15 | 72951348  | 72966477  | 8.68 | F2      |
| snp51480-scaffold754-1977841  | 19338874  | 21 | 19344168  | 19413812  | 8.68 | ZNF710  |
| snp17847-scaffold185-1738069  | 71321095  | 11 | 71318175  | 71323139  | 8.67 | ATRAID  |
| snp17847-scaffold185-1738069  | 71321095  | 11 | 71296208  | 71317540  | 8.67 | CAD     |
| snp17847-scaffold185-1738069  | 71321095  | 11 | 71283415  | 71287928  | 8.67 | SLC30A3 |
| snp17847-scaffold185-1738069  | 71321095  | 11 | 71323173  | 71335854  | 8.67 | SLC5A6  |
| snp58825-scaffold960-1227200  | 58832432  | 24 | 58845185  | 58847241  | 8.67 | MC4R    |
| snp2346-scaffold107-2452613   | 77478886  | 5  | 77477953  | 77568181  | 8.67 | OVCH1   |
| snp2346-scaffold107-2452613   | 77478886  | 5  | 77180226  | 77469882  | 8.67 | TMTC1   |
| snp40832-scaffold524-1556971  | 26599848  | 9  | 26538432  | 26560669  | 8.67 | AMD1    |
| snp40832-scaffold524-1556971  | 26599848  | 9  | 26593874  | 26763572  | 8.67 | CDK19   |
| snp38800-scaffold492-1591907  | 39785999  | 21 | 39596313  | 39830998  | 8.67 | NUBPL   |
| snp3966-scaffold1125-804912   | 38632289  | 16 | 38676076  | 38705654  | 8.60 | AADACL4 |
| snp43972-scaffold595-3101875  | 92193503  | 3  | 91824967  | 92309613  | 8.57 | FAF1    |
| snp21760-scaffold2131-1573314 | 48961677  | 19 | 48885727  | 49030322  | 8.57 | TBCD    |
| snp21760-scaffold2131-1573314 | 48961677  | 19 | 48971010  | 48979922  | 8.57 | ZNF750  |
| snp1704-scaffold1048-413128   | 49745828  | 15 | 49709708  | 49723304  | 8.56 | PLEKHB1 |
| snp1704-scaffold1048-413128   | 49745828  | 15 | 49737187  | 49776075  | 8.56 | RAB6A   |
| snp33637-scaffold395-633966   | 14197109  | 11 | 14133389  | 14182817  | 8.55 | SRD5A2  |
| snp17952-scaffold185-6260329  | 66798835  | 11 | 66741477  | 66902378  | 8.54 | AAK1    |
| snp54248-scaffold827-4346234  | 45388101  | 22 | 44386916  | 45346669  | 8.52 | ERC2    |
| snp54248-scaffold827-4346234  | 45388101  | 22 | 45371355  | 45381514  | 8.52 | WNT5A   |
| snp17493-scaffold181-148816   | 96493936  | 3  | 96509589  | 96686341  | 8.52 | MAST2   |
| snp29672-scaffold321-4646523  | 45837529  | 3  | 45865966  | 45876916  | 8.46 | RWDD3   |
| snp57641-scaffold923-1312864  | 55028971  | 2  | 53950365  | 56134849  | 8.45 | LRP1B   |
| snp25787-scaffold266-321974   | 125170430 | 1  | 125060875 | 125186297 | 8.42 | ZBTB38  |
| snp4851-scaffold1162-198452   | 25628222  | 15 | 25676078  | 25702241  | 8.41 | BUD13   |
| snp16222-scaffold1704-1001411 | 102628534 | 3  | 102666208 | 102672931 | 8.40 | HEYL    |
| snp16222-scaffold1704-1001411 | 102628534 | 3  | 102607335 | 102613340 | 8.40 | HPCAL4  |
| snp16222-scaffold1704-1001411 | 102628534 | 3  | 102618944 | 102636840 | 8.40 | NT5C1A  |
| snp55126-scaffold847-612212   | 7470934   | 26 | 7515220   | 7608644   | 8.40 | A1CF    |
| snp25897-scaffold2678-81588   | 14888953  | 30 | 14834131  | 14983701  | 8.40 | GUCY2F  |
| snp5951-scaffold121-413706    | 60619653  | 17 | 60594506  | 60598837  | 8.36 | LHX5    |
| snp5951-scaffold121-413706    | 60619653  | 17 | 60653198  | 60669019  | 8.36 | PLBD2   |
| snp5951-scaffold121-413706    | 60619653  | 17 | 60642623  | 60650656  | 8.36 | SDS     |
| snp5951-scaffold121-413706    | 60619653  | 17 | 60615084  | 60627393  | 8.36 | SDSL    |
| snp13853-scaffold154-2559968  | 31452643  | 22 | 31427864  | 31659079  | 8.36 | MITF    |
| snp34005-scaffold40-2680622   | 50848175  | 20 | 50332461  | 51128671  | 8.35 | CDH12   |
| snp3307-scaffold1101-219587   | 53629883  | 19 | 53534007  | 53581400  | 8.34 | SEC14L1 |
| snp59356-scaffold978-358352   | 27683765  | 8  | 27526581  | 27870426  | 8.29 | CCDC171 |
| snp8984-scaffold1327-407058   | 22074707  | 16 | 22084481  | 22089216  | 8.27 | HLX     |
| snp11339-scaffold141-716187   | 41486393  | 16 | 41511644  | 41526022  | 8.27 | TMEM201 |
| snp17038-scaffold1776-992575  | 66147024  | 16 | 66004442  | 66237103  | 8.26 | KCNK2   |
| snp28450-scaffold303-3829345  | 33351681  | 19 | 33277488  | 33333839  | 8.25 | EPN2    |

|                               |           |    |           |           |      |          |
|-------------------------------|-----------|----|-----------|-----------|------|----------|
| snp28450-scaffold303-3829345  | 33351681  | 19 | 33389814  | 33419063  | 8.25 | FAM83G   |
| snp28450-scaffold303-3829345  | 33351681  | 19 | 33352697  | 33373867  | 8.25 | GRAP     |
| snp28450-scaffold303-3829345  | 33351681  | 19 | 33373894  | 33429939  | 8.25 | SLC5A10  |
| snp4606-scaffold1147-1932056  | 73600093  | 30 | 73567629  | 73594109  | 8.25 | FAM155B  |
| snp3089-scaffold1095-70867    | 31960895  | 12 | 31978856  | 32038252  | 8.21 | SPATA13  |
| snp25386-scaffold262-821529   | 22948497  | 20 | 22939592  | 23050756  | 8.14 | ANKRD55  |
| snp58106-scaffold94-6000063   | 68898128  | 6  | 68923448  | 68939086  | 8.11 | SRD5A3   |
| snp48086-scaffold68-3492027   | 48120058  | 10 | 47894820  | 48080535  | 8.07 | LIPC     |
| snp22502-scaffold2226-313730  | 14970953  | 14 | 14974398  | 15243512  | 8.07 | FAM135B  |
| snp32649-scaffold375-1025987  | 14251005  | 17 | 14153731  | 14279787  | 8.07 | GAB1     |
| snp2787-scaffold1080-574611   | 99279871  | 6  | 99304745  | 99321823  | 8.06 | HSD17B13 |
| snp11539-scaffold1421-449266  | 16706469  | 10 | 16644018  | 16695830  | 8.06 | TLE3     |
| snp44757-scaffold609-1219218  | 50829477  | 17 | 50810012  | 51017724  | 8.04 | NCOR2    |
| snp6380-scaffold1224-2308780  | 3956878   | 22 | 3625031   | 4580147   | 8.03 | RBMS3    |
| snp30665-scaffold339-4546335  | 45947673  | 7  | 45884093  | 45919583  | 7.99 | CDC25C   |
| snp30665-scaffold339-4546335  | 45947673  | 7  | 45924543  | 45934561  | 7.99 | FAM53C   |
| snp30665-scaffold339-4546335  | 45947673  | 7  | 45931976  | 45996880  | 7.99 | KDM3B    |
| snp10557-scaffold1376-1305714 | 73295347  | 8  | 73326383  | 73343421  | 7.96 | AQP7     |
| snp10557-scaffold1376-1305714 | 73295347  | 8  | 73250799  | 73316071  | 7.96 | NFX1     |
| snp546-scaffold1015-982216    | 41553201  | 28 | 41519177  | 41526270  | 7.95 | MSMB     |
| snp546-scaffold1015-982216    | 41553201  | 28 | 41495924  | 41517898  | 7.95 | NCOA4    |
| snp54194-scaffold827-1877476  | 42919343  | 22 | 42847895  | 42915664  | 7.94 | ABHD6    |
| snp54194-scaffold827-1877476  | 42919343  | 22 | 42916787  | 42937310  | 7.94 | DNASE1L3 |
| snp54194-scaffold827-1877476  | 42919343  | 22 | 42955805  | 43095189  | 7.94 | FLNB     |
| snp35974-scaffold431-2859919  | 48261592  | 12 | 48286143  | 48371815  | 7.93 | TBC1D4   |
| snp10013-scaffold1356-1211722 | 49467500  | 7  | 49495736  | 49510145  | 7.93 | SPRY4    |
| snp41806-scaffold543-4175450  | 106966316 | 3  | 107001107 | 107037825 | 7.92 | DLGAP3   |
| snp56583-scaffold894-1315674  | 13490477  | 30 | 13499025  | 13566622  | 7.92 | TSC22D3  |
| snp33904-scaffold4-769205     | 93111959  | 11 | 92985711  | 93476945  | 7.91 | DENND1A  |
| snp17755-scaffold1842-138629  | 3406415   | 11 | 3263373   | 3389534   | 7.90 | TMEM131  |
| snp41251-scaffold536-249647   | 7245974   | 11 | 7283269   | 7294454   | 7.88 | MFSD9    |
| snp41251-scaffold536-249647   | 7245974   | 11 | 7217329   | 7279675   | 7.88 | SLC9A2   |
| snp18784-scaffold19-4425409   | 64677932  | 30 | 64559560  | 64720979  | 7.88 | BRWD3    |
| snp55216-scaffold85-1273613   | 17381410  | 7  | 17392468  | 17396930  | 7.87 | DIRAS1   |
| snp55216-scaffold85-1273613   | 17381410  | 7  | 17357032  | 17364911  | 7.87 | SGTA     |
| snp55216-scaffold85-1273613   | 17381410  | 7  | 17377648  | 17384058  | 7.87 | SLC39A3  |
| snp55216-scaffold85-1273613   | 17381410  | 7  | 17333491  | 17345137  | 7.87 | THOP1    |
| snp5909-scaffold1206-678477   | 56393679  | 17 | 56382865  | 56414059  | 7.86 | SUDS3    |
| snp5909-scaffold1206-678477   | 56393679  | 17 | 56432040  | 56604592  | 7.86 | TAOK3    |
| snp8944-scaffold1322-658264   | 86012095  | 5  | 86038611  | 86053274  | 7.84 | GOLT1B   |
| snp8944-scaffold1322-658264   | 86012095  | 5  | 85956792  | 86014395  | 7.84 | GYS2     |
| snp8944-scaffold1322-658264   | 86012095  | 5  | 86053393  | 86089015  | 7.84 | RECQL    |
| snp8944-scaffold1322-658264   | 86012095  | 5  | 86020922  | 86029883  | 7.84 | SPX      |
| snp29140-scaffold3125-7445    | 116010625 | 3  | 115999109 | 116003080 | 7.81 | CROCC2   |
| snp36933-scaffold448-1433540  | 77550217  | 9  | 77583273  | 77792800  | 7.81 | SCAF8    |
| snp1354-scaffold1038-4862     | 844467    | 19 | 304128    | 1138942   | 7.80 | CA10     |
| snp41946-scaffold548-105829   | 26286316  | 15 | 26244237  | 26265309  | 7.79 | BACE1    |
| snp41946-scaffold548-105829   | 26286316  | 15 | 26276007  | 26345425  | 7.79 | CEP164   |
| snp41946-scaffold548-105829   | 26286316  | 15 | 26195625  | 26240724  | 7.79 | RNF214   |
| snp47339-scaffold665-1615171  | 34433186  | 5  | 34234029  | 34613705  | 7.77 | NELL2    |
| snp46783-scaffold653-529471   | 99520394  | 11 | 99500465  | 99535235  | 7.76 | ABL1     |
| snp46783-scaffold653-529471   | 99520394  | 11 | 99551823  | 99568400  | 7.76 | FIBCD1   |
| snp46783-scaffold653-529471   | 99520394  | 11 | 99540686  | 99541239  | 7.76 | QRFP     |
| snp24799-scaffold254-369527   | 57997743  | 7  | 57987431  | 57995580  | 7.74 | CD74     |
| snp24799-scaffold254-369527   | 57997743  | 7  | 58013484  | 58017420  | 7.74 | RPS14    |
| snp24799-scaffold254-369527   | 57997743  | 7  | 57947788  | 57985981  | 7.74 | TCOF1    |

|                               |           |    |           |           |      |         |
|-------------------------------|-----------|----|-----------|-----------|------|---------|
| snp30658-scaffold339-4150649  | 45551987  | 7  | 45584757  | 45662792  | 7.74 | FAM13B  |
| snp30658-scaffold339-4150649  | 45551987  | 7  | 45523295  | 45542232  | 7.74 | MYOT    |
| snp30658-scaffold339-4150649  | 45551987  | 7  | 45543791  | 45586908  | 7.74 | PKD2L2  |
| snp17378-scaffold180-936947   | 18392023  | 3  | 18343701  | 18353604  | 7.72 | ANXA9   |
| snp17378-scaffold180-936947   | 18392023  | 3  | 18365079  | 18368950  | 7.72 | CERS2   |
| snp17378-scaffold180-936947   | 18392023  | 3  | 18333956  | 18343032  | 7.72 | FAM63A  |
| snp17378-scaffold180-936947   | 18392023  | 3  | 18368350  | 18398426  | 7.72 | SETDB1  |
| snp36349-scaffold4353-182963  | 116743421 | 3  | 116705004 | 116707709 | 7.70 | PDCD1   |
| snp36349-scaffold4353-182963  | 116743421 | 3  | 116724312 | 116728834 | 7.70 | RTP5    |
| snp43299-scaffold577-460316   | 14091055  | 5  | 14099258  | 14130076  | 7.70 | TSPAN19 |
| snp37183-scaffold452-1196129  | 19785356  | 19 | 19777250  | 19877833  | 7.70 | MYO18A  |
| snp37183-scaffold452-1196129  | 19785356  | 19 | 19748979  | 19762646  | 7.70 | PIPOX   |
| snp237-scaffold1006-645819    | 8405163   | 29 | 8374587   | 8401563   | 7.68 | EED     |
| snp18726-scaffold1895-259781  | 4523688   | 5  | 4560568   | 4601032   | 7.66 | CAPS2   |
| snp59320-scaffold975-1213737  | 12281623  | 23 | 12155806  | 12479531  | 7.65 | DNAH8   |
| snp10560-scaffold1376-1406813 | 73194248  | 8  | 73213947  | 73223629  | 7.65 | BAG1    |
| snp10560-scaffold1376-1406813 | 73194248  | 8  | 73226586  | 73240474  | 7.65 | CHMP5   |
| snp10560-scaffold1376-1406813 | 73194248  | 8  | 73198781  | 73206539  | 7.65 | SPINK4  |
| snp58279-scaffold945-1697505  | 108165663 | 1  | 108001492 | 108261942 | 7.64 | VEPH1   |
| snp20377-scaffold202-540677   | 30317420  | 2  | 30220911  | 30366138  | 7.63 | SCN2A   |
| snp54786-scaffold838-946181   | 12700195  | 28 | 12704559  | 12822609  | 7.63 | PHYHIPL |
| snp52869-scaffold793-615567   | 47644946  | 11 | 47589844  | 47602264  | 7.61 | CD8A    |
| snp52869-scaffold793-615567   | 47644946  | 11 | 47612123  | 47652440  | 7.61 | RMND5A  |
| snp7708-scaffold1278-771909   | 68033839  | 13 | 68076423  | 68081782  | 7.60 | EMILIN3 |
| snp7708-scaffold1278-771909   | 68033839  | 13 | 68063762  | 68078064  | 7.60 | LPIN3   |
| snp7708-scaffold1278-771909   | 68033839  | 13 | 67927559  | 68059162  | 7.60 | ZHX3    |
| snp84-scaffold100-210601      | 5282247   | 15 | 5315124   | 5336553   | 7.59 | BIRC2   |
| snp84-scaffold100-210601      | 5282247   | 15 | 5206514   | 5284394   | 7.59 | TMEM123 |
| snp43306-scaffold577-708473   | 14339212  | 5  | 14375503  | 14397299  | 7.58 | ALX1    |
| snp43306-scaffold577-708473   | 14339212  | 5  | 14130161  | 14336237  | 7.58 | LRRIQ1  |
| snp6961-scaffold1256-213971   | 20422980  | 19 | 20461867  | 20567670  | 7.57 | EFCAB5  |
| snp6961-scaffold1256-213971   | 20422980  | 19 | 20220762  | 20399216  | 7.57 | SSH2    |
| snp22127-scaffold2185-306044  | 38500747  | 15 | 38470848  | 38534866  | 7.56 | PARVA   |
| snp14812-scaffold1599-477286  | 47745159  | 16 | 47721996  | 47801628  | 7.56 | TTC34   |
| snp29540-scaffold320-776697   | 147704741 | 1  | 147326883 | 147668469 | 7.55 | KCNJ6   |
| snp37288-scaffold454-1769470  | 40034626  | 20 | 39993599  | 40015234  | 7.51 | TARS    |
| snp43469-scaffold579-4675864  | 61143561  | 9  | 61147133  | 61373439  | 7.50 | MAP3K5  |
| snp43469-scaffold579-4675864  | 61143561  | 9  | 60960962  | 61117076  | 7.50 | MAP7    |
| snp9878-scaffold1352-1449195  | 92947590  | 6  | 92951090  | 92979876  | 7.50 | BMP3    |
| snp20458-scaffold202-4049754  | 33826497  | 2  | 33804660  | 33885573  | 7.50 | DPP4    |
| snp21197-scaffold207-3797821  | 16533442  | 17 | 16371646  | 16657845  | 7.49 | RNF150  |
| snp11591-scaffold1423-1776117 | 69396708  | 9  | 69419800  | 69482327  | 7.48 | EPM2A   |
| snp33728-scaffold397-62685    | 36047955  | 10 | 36083433  | 36084197  | 7.46 | RPL10L  |
| snp56039-scaffold873-1256692  | 21807282  | 30 | 21760010  | 21897069  | 7.44 | DOCK11  |
| snp13875-scaffold154-3493246  | 30519365  | 22 | 29982019  | 30513248  | 7.44 | FOXP1   |
| snp44176-scaffold60-601506    | 4936177   | 16 | 4915991   | 4942835   | 7.42 | CFH     |
| snp12376-scaffold1468-95374   | 23028157  | 21 | 23037082  | 23054290  | 7.41 | CTSH    |
| snp12376-scaffold1468-95374   | 23028157  | 21 | 23013066  | 23029887  | 7.41 | MORF4L1 |
| snp12376-scaffold1468-95374   | 23028157  | 21 | 23077136  | 23179266  | 7.41 | RASGRF1 |
| snp17499-scaffold181-371955   | 96270797  | 3  | 96237766  | 96252377  | 7.39 | LRRC41  |
| snp17499-scaffold181-371955   | 96270797  | 3  | 96306780  | 96323637  | 7.39 | LURAP1  |
| snp17499-scaffold181-371955   | 96270797  | 3  | 96252303  | 96278857  | 7.39 | RAD54L  |
| snp25952-scaffold2688-18597   | 66161285  | 21 | 66176048  | 66187150  | 7.37 | ADSSL1  |
| snp25952-scaffold2688-18597   | 66161285  | 21 | 66204164  | 66209442  | 7.37 | AKT1    |
| snp8941-scaffold1322-518308   | 85872139  | 5  | 85894650  | 85912973  | 7.37 | LDHB    |
| snp39736-scaffold509-45814    | 32727825  | 28 | 32741472  | 32748482  | 7.35 | PPIF    |

|                              |           |    |           |           |      |            |
|------------------------------|-----------|----|-----------|-----------|------|------------|
| snp39736-scaffold509-45814   | 32727825  | 28 | 32765340  | 32816779  | 7.35 | ZCCHC24    |
| snp39736-scaffold509-45814   | 32727825  | 28 | 32598941  | 32719158  | 7.35 | ZMIZ1      |
| snp32414-scaffold369-1265157 | 9005972   | 13 | 6976150   | 9059380   | 7.35 | MACROD2    |
| snp1728-scaffold1048-1443285 | 50775985  | 15 | 50665549  | 50726757  | 7.34 | RNF169     |
| snp1728-scaffold1048-1443285 | 50775985  | 15 | 50799183  | 50825381  | 7.34 | SPCS2      |
| snp1728-scaffold1048-1443285 | 50775985  | 15 | 50730616  | 50798706  | 7.34 | XRRA1      |
| snp10115-scaffold136-150821  | 23869363  | 29 | 23723499  | 23888528  | 7.31 | NAV2       |
| snp32202-scaffold3643-393290 | 49794943  | 19 | 49826987  | 49854929  | 7.31 | ASPSCR1    |
| snp32202-scaffold3643-393290 | 49794943  | 19 | 49748666  | 49755221  | 7.31 | DUS1L      |
| snp32202-scaffold3643-393290 | 49794943  | 19 | 49755414  | 49759668  | 7.31 | GPS1       |
| snp32202-scaffold3643-393290 | 49794943  | 19 | 49814286  | 49822101  | 7.31 | LRRC45     |
| snp32202-scaffold3643-393290 | 49794943  | 19 | 49811386  | 49813056  | 7.31 | RAC3       |
| snp32202-scaffold3643-393290 | 49794943  | 19 | 49760948  | 49764723  | 7.31 | RFNG       |
| snp32202-scaffold3643-393290 | 49794943  | 19 | 49824632  | 49825878  | 7.31 | STRA13     |
| snp54013-scaffold821-1145339 | 38828723  | 6  | 38387581  | 39698311  | 7.30 | KCNIP4     |
| snp41204-scaffold534-30258   | 51213263  | 18 | 51194626  | 51206364  | 7.29 | IGSF23     |
| snp41204-scaffold534-30258   | 51213263  | 18 | 51260402  | 51269445  | 7.29 | NKPD1      |
| snp41204-scaffold534-30258   | 51213263  | 18 | 51246606  | 51253443  | 7.29 | PPP1R37    |
| snp41204-scaffold534-30258   | 51213263  | 18 | 51222865  | 51238954  | 7.29 | PVR        |
| snp39993-scaffold510-1488579 | 5881940   | 7  | 5811604   | 5891583   | 7.28 | NWD1       |
| snp37032-scaffold449-759924  | 32993018  | 14 | 32948815  | 32957979  | 7.26 | RP1        |
| snp29908-scaffold325-568853  | 20979083  | 1  | 20877382  | 20977557  | 7.26 | NRIP1      |
| snp27536-scaffold294-2106    | 7129041   | 24 | 7093391   | 7121092   | 7.25 | SOCS6      |
| snp47875-scaffold675-232629  | 25466890  | 3  | 25515528  | 25588819  | 7.25 | CASQ2      |
| snp47875-scaffold675-232629  | 25466890  | 3  | 25451404  | 25451652  | 7.25 | NHLH2      |
| snp17406-scaffold1802-716394 | 26009025  | 5  | 25963434  | 25977216  | 7.23 | AAAS       |
| snp17406-scaffold1802-716394 | 26009025  | 5  | 25977486  | 25984534  | 7.23 | C5H12orf10 |
| snp17406-scaffold1802-716394 | 26009025  | 5  | 25989855  | 26011574  | 7.23 | ESPL1      |
| snp17406-scaffold1802-716394 | 26009025  | 5  | 26056222  | 26072841  | 7.23 | ITGB7      |
| snp17406-scaffold1802-716394 | 26009025  | 5  | 26017815  | 26019407  | 7.23 | MFSO5      |
| snp17406-scaffold1802-716394 | 26009025  | 5  | 25984898  | 25988485  | 7.23 | PFDN5      |
| snp17406-scaffold1802-716394 | 26009025  | 5  | 26035637  | 26055231  | 7.23 | RARG       |
| snp17406-scaffold1802-716394 | 26009025  | 5  | 25950262  | 25959197  | 7.23 | SP7        |
| snp40646-scaffold52-2617351  | 29574043  | 11 | 29622249  | 29653124  | 7.23 | FBXO11     |
| snp40646-scaffold52-2617351  | 29574043  | 11 | 29611692  | 29622279  | 7.23 | MSH6       |
| snp37948-scaffold47-1210340  | 55231175  | 30 | 55255117  | 55268894  | 7.22 | DKC1       |
| snp37948-scaffold47-1210340  | 55231175  | 30 | 55148092  | 55210480  | 7.22 | GAB3       |
| snp37948-scaffold47-1210340  | 55231175  | 30 | 55269980  | 55286799  | 7.22 | MPP1       |
| snp49011-scaffold7-2053765   | 30338229  | 13 | 30295240  | 30372727  | 7.22 | TRDMT1     |
| snp49011-scaffold7-2053765   | 30338229  | 13 | 30388146  | 30395383  | 7.22 | VIM        |
| snp29220-scaffold314-1763160 | 21764421  | 8  | 21705124  | 21734946  | 7.22 | MTAP       |
| snp47069-scaffold659-798157  | 21585507  | 3  | 21529785  | 21561514  | 7.21 | PHGDH      |
| snp25114-scaffold259-1662479 | 57922514  | 10 | 57824025  | 58099054  | 7.20 | FBN1       |
| snp6583-scaffold1234-345507  | 58119507  | 24 | 58140682  | 58149441  | 7.20 | SEC11C     |
| snp47462-scaffold6689-76365  | 100930047 | 5  | 100889134 | 100897084 | 7.18 | C5H22orf23 |
| snp47462-scaffold6689-76365  | 100930047 | 5  | 100865495 | 100886919 | 7.18 | MICALL1    |
| snp47462-scaffold6689-76365  | 100930047 | 5  | 100897149 | 100905880 | 7.18 | POLR2F     |
| snp47462-scaffold6689-76365  | 100930047 | 5  | 100909406 | 100913977 | 7.18 | SOX10      |
| snp59481-scaffold980-845143  | 83228568  | 6  | 83186636  | 83197701  | 7.17 | AMBN       |
| snp59481-scaffold980-845143  | 83228568  | 6  | 83222497  | 83240117  | 7.17 | ENAM       |
| snp59481-scaffold980-845143  | 83228568  | 6  | 83248737  | 83258709  | 7.17 | JCHAIN     |
| snp4737-scaffold1157-159806  | 113943596 | 3  | 113896009 | 113896589 | 7.14 | HES6       |
| snp4737-scaffold1157-159806  | 113943596 | 3  | 113904198 | 113932978 | 7.14 | PER2       |
| snp4737-scaffold1157-159806  | 113943596 | 3  | 113989839 | 114056619 | 7.14 | TRAF3IP1   |
| snp2923-scaffold109-662619   | 7312794   | 22 | 7362691   | 7399177   | 7.12 | CRTAP      |
| snp2923-scaffold109-662619   | 7312794   | 22 | 7245905   | 7321439   | 7.12 | GLB1       |

|                               |           |    |           |           |      |          |
|-------------------------------|-----------|----|-----------|-----------|------|----------|
| snp2923-scaffold109-662619    | 7312794   | 22 | 7343703   | 7345307   | 7.12 | TMPPE    |
| snp7917-scaffold1287-141533   | 70243137  | 10 | 70157907  | 70308351  | 7.12 | SYT16    |
| snp58721-scaffold958-776977   | 21469623  | 13 | 21495707  | 21498809  | 7.12 | SKIDA1   |
| snp7711-scaffold1278-926214   | 67879534  | 13 | 67904050  | 67921918  | 7.11 | PLCG1    |
| snp7711-scaffold1278-926214   | 67879534  | 13 | 67820747  | 67874792  | 7.11 | TOP1     |
| snp20503-scaffold202-5963261  | 35740004  | 2  | 35709296  | 35815778  | 7.10 | PLA2R1   |
| snp45701-scaffold627-3512011  | 43213913  | 1  | 42861213  | 43258681  | 7.09 | CMSS1    |
| snp45701-scaffold627-3512011  | 43213913  | 1  | 42886833  | 43179948  | 7.09 | FILIP1L  |
| snp50511-scaffold725-1038375  | 66154228  | 9  | 66129081  | 66201172  | 7.09 | VTA1     |
| snp26010-scaffold27-205746    | 121107825 | 30 | 120715423 | 121123975 | 7.08 | MID1     |
| snp15875-scaffold1667-1154070 | 35491729  | 19 | 35449127  | 35455662  | 7.07 | EME1     |
| snp15875-scaffold1667-1154070 | 35491729  | 19 | 35436739  | 35448625  | 7.07 | LRRC59   |
| snp15875-scaffold1667-1154070 | 35491729  | 19 | 35455562  | 35460678  | 7.07 | MRPL27   |
| snp15875-scaffold1667-1154070 | 35491729  | 19 | 35466747  | 35474242  | 7.07 | XYLT2    |
| snp49862-scaffold712-214671   | 49928457  | 5  | 49788397  | 50353776  | 7.06 | FAM19A2  |
| snp41569-scaffold541-12945    | 53987778  | 6  | 53906188  | 53995063  | 7.06 | DTHD1    |
| snp10680-scaffold138-67757    | 105598322 | 2  | 105638787 | 105657922 | 7.05 | ARPC2    |
| snp10680-scaffold138-67757    | 105598322 | 2  | 105587091 | 105592060 | 7.05 | CXCR1    |
| snp10680-scaffold138-67757    | 105598322 | 2  | 105549665 | 105567474 | 7.05 | CXCR2    |
| snp32678-scaffold376-470308   | 51523875  | 16 | 51523484  | 51558642  | 7.05 | PDPN     |
| snp11125-scaffold14-2350075   | 69142718  | 14 | 69181015  | 69600910  | 7.04 | ZFPM2    |
| snp37644-scaffold463-676381   | 47242140  | 5  | 47180534  | 47268469  | 7.03 | WIF1     |
| snp29042-scaffold312-4303713  | 61727979  | 2  | 61685261  | 61748343  | 7.02 | ACMSD    |
| snp42272-scaffold556-600154   | 8608587   | 26 | 8526582   | 8628101   | 7.00 | PTEN     |
| snp52802-scaffold791-1809974  | 54459681  | 14 | 54374081  | 54579563  | 6.99 | ZNF704   |
| snp30797-scaffold340-42188    | 13492644  | 6  | 13372066  | 13453337  | 6.99 | ENPEP    |
| snp56794-scaffold9-1835501    | 60335356  | 4  | 60199278  | 60455060  | 6.99 | BMPER    |
| snp26075-scaffold271-591208   | 84522866  | 10 | 84560086  | 84563616  | 6.99 | NGB      |
| snp26075-scaffold271-591208   | 84522866  | 10 | 84572517  | 84605610  | 6.99 | POMT2    |
| snp26075-scaffold271-591208   | 84522866  | 10 | 84412260  | 84554245  | 6.99 | TMEM63C  |
| snp20517-scaffold202-6604247  | 36380990  | 2  | 36121178  | 36450399  | 6.97 | BAZ2B    |
| snp17183-scaffold1790-1268716 | 8240350   | 23 | 8266578   | 8272678   | 6.97 | PACSIN1  |
| snp17183-scaffold1790-1268716 | 8240350   | 23 | 8280496   | 8299503   | 6.97 | SPDEF    |
| snp29619-scaffold321-2228988  | 48255064  | 3  | 48198174  | 48206298  | 6.96 | RPL5     |
| snp51705-scaffold760-222846   | 7508063   | 6  | 7482866   | 7485010   | 6.96 | TRAM1L1  |
| snp12793-scaffold1490-44599   | 39752772  | 29 | 39756629  | 39795622  | 6.94 | ATL3     |
| snp12793-scaffold1490-44599   | 39752772  | 29 | 39669701  | 39703251  | 6.94 | HRASLS5  |
| snp12793-scaffold1490-44599   | 39752772  | 29 | 39697222  | 39706087  | 6.94 | LGALS12  |
| snp12793-scaffold1490-44599   | 39752772  | 29 | 39795757  | 39866012  | 6.94 | RTN3     |
| snp56719-scaffold898-253921   | 5151423   | 4  | 5122812   | 5509351   | 6.94 | ABCA13   |
| snp51110-scaffold746-55079    | 41436884  | 17 | 41463139  | 41557739  | 6.93 | GRIA2    |
| snp55911-scaffold869-1796393  | 31694359  | 16 | 31591143  | 31726869  | 6.92 | CEP170   |
| snp10028-scaffold1356-1850057 | 48829165  | 7  | 48770514  | 48886731  | 6.92 | DIAPH1   |
| snp44739-scaffold609-408841   | 50019100  | 17 | 49842867  | 50239942  | 6.92 | TMEM132B |
| snp20653-scaffold2034-689378  | 689378    | 29 | 595533    | 639749    | 6.91 | CEP295   |
| snp34270-scaffold402-1953496  | 110391497 | 30 | 110431222 | 110655298 | 6.90 | CNKSR2   |
| snp34270-scaffold402-1953496  | 110391497 | 30 | 110428773 | 110433236 | 6.90 | KLHL34   |
| snp34270-scaffold402-1953496  | 110391497 | 30 | 110317182 | 110367234 | 6.90 | SMPX     |
| snp40818-scaffold524-844497   | 25887374  | 9  | 25849366  | 25904409  | 6.89 | FYN      |
| snp59468-scaffold980-522581   | 82906006  | 6  | 82894746  | 82908392  | 6.89 | CSN3     |
| snp5067-scaffold1172-113725   | 35491803  | 28 | 34431805  | 35658169  | 6.89 | NRG3     |
| snp59167-scaffold971-125501   | 142272452 | 1  | 142301577 | 142319224 | 6.88 | UBE2G2   |
| snp26751-scaffold281-747096   | 35081977  | 6  | 35081521  | 35095015  | 6.87 | IBSP     |
| snp26751-scaffold281-747096   | 35081977  | 6  | 35045422  | 35059786  | 6.87 | MEPE     |
| snp59100-scaffold969-3176120  | 29753867  | 9  | 29684804  | 29956565  | 6.87 | PDSS2    |
| snp3355-scaffold1102-483452   | 38094943  | 28 | 37888788  | 38577268  | 6.87 | GRID1    |



|                              |           |    |           |           |      |        |
|------------------------------|-----------|----|-----------|-----------|------|--------|
| snp55536-scaffold860-695794  | 17575017  | 4  | 17360213  | 17848796  | 6.87 | THSD7A |
| snp53867-scaffold82-7642345  | 78844910  | 2  | 78759491  | 78832020  | 6.86 | GLS    |
| snp53867-scaffold82-7642345  | 78844910  | 2  | 78834675  | 78877613  | 6.86 | STAT1  |
| snp53867-scaffold82-7642345  | 78844910  | 2  | 78885554  | 78989435  | 6.86 | STAT4  |
| snp29470-scaffold3193-172583 | 54759606  | 18 | 54800146  | 54810633  | 6.86 | IZUMO2 |
| snp29470-scaffold3193-172583 | 54759606  | 18 | 54719224  | 54756347  | 6.86 | VRK3   |
| snp29470-scaffold3193-172583 | 54759606  | 18 | 54756801  | 54768765  | 6.86 | ZNF473 |
| snp11979-scaffold1440-432774 | 108825731 | 6  | 108761413 | 109229113 | 6.86 | LDB2   |
| snp58103-scaffold94-5833878  | 68731943  | 6  | 68682418  | 68729268  | 6.86 | KDR    |
| snp2010-scaffold1059-936497  | 130673358 | 2  | 130571058 | 130636651 | 6.84 | ECE1   |

---
